# Supplementary material for: Optical skyrmions from metafibers with subwavelength features
Source: PubMed Central journal article supplement (PMC11584664; doi:10.1038/s41467-024-54207-z), 2024-11-22
Supplement: 41467_2024_54207_MOESM1_ESM.pdf [file 41467_2024_54207_MOESM1_ESM.pdf]

# Optical skyrmions from metafibers with subwavelength features: Supplementary Material.

Tiantian He,<sup>1,2,†</sup> Yuan Meng,<sup>1,3,†</sup> Lele Wang,<sup>1,2</sup> Hongkun Zhong,<sup>1,2</sup> Nilo Mata-Cervera,<sup>4</sup> Dan Li,<sup>1,2</sup> Ping Yan,<sup>1,2</sup> Qiang Liu,<sup>1,2</sup> Yijie Shen<sup>4,5,\*</sup> & Qirong Xiao<sup>1,2,\*</sup>

<sup>1</sup> *Department of Precision Instrument, Tsinghua University, Beijing 100084, China*

<sup>2</sup> *State Key Laboratory of Precision Space-time Information Sensing Technology, No.1 Qinghua Garden, Chengfu Road, Beijing 100084, China*

<sup>3</sup> *Present Address: Mechanical Engineering and Materials Science, Washington University in St Louis, St Louis, MO 63130, USA*

<sup>4</sup> *Centre for Disruptive Photonic Technologies, School of Physical and Mathematical Sciences & The Photonics Institute, Nanyang Technological University, Singapore 637371, Singapore*

<sup>5</sup> *School of Electrical and Electronic Engineering, Nanyang Technological University, Singapore 639798, Singapore*

† Equal Contribution

\* E-mails: yijie.shen@ntu.edu.sg, xiaoqirong@mail.tsinghua.edu.cn

## Supplementary Note 1: The design strategy of metasurface

In cylindrical coordinates  $(r, \phi, z)$ , the complex amplitude of the  $n^{\text{th}}$ -order Bessel beam (BB) propagating along the  $z$ -axis can be described by<sup>1</sup>

$$E(r, \phi, z) = AJ_n(K_r r) \exp(ik_z z) \exp(\pm in\phi) \quad (\text{S1})$$

where  $A$  is the amplitude,  $J_n$  is the  $n^{\text{th}}$  Bessel function of the first kind,  $k = \sqrt{k_r^2 + k_z^2}$  is the total wavenumber, while  $k_z$  and  $k_r$  are the transverse and longitudinal wave numbers,  $\phi$  is the azimuthal angle, which represents the high-order BBs ( $n \neq 0$ ) must carry orbital momentum and have zero intensity along  $z$ -axis at  $r = 0$ .

Although the generation of ideal BBs requires an infinite amount of power, they can be greatly approximated using a uniform illumination over an axicon, which can be achieved in real settings. On the other hand, BBs carrying topological charge ( $\ell \neq 0$ ) have a helical wavefront, which can be generated by propagating a flat wavefront through both an axicon and a spiral phase plate. That is, the phasefront of  $J_1$  can be obtained just by superimposing a vortex phase on  $J_0$ . The order of the BB  $\ell$  is determined by the topological charge induced by the spiral phase plate, and its amplitude profile can be controlled by changing the parameters of the axicon. In addition, the beam in the expansion section diffuses, resulting in an additional spherical phase on the fiber facet. To correct the resulting wavefront, a correction phase  $-P_s(x, y)$  is superimposed to the design phase, compensating the wavefront  $P_s(x, y)$ . To determine  $P_s$ , we obtain the field complex amplitude field distribution after propagating at a certain distance using the simulation in the Supplementary Note 2.

37 Therefore, the target phase profiles of dual-polarizations metasurface<sup>2</sup> can be expressed as:

$$38 \quad \phi_x = -P_s + \frac{2\pi}{\lambda} \sqrt{x^2 + y^2} \text{NA}_1 \quad (\text{S2})$$

$$39 \quad \phi_y = -P_s + \frac{2\pi}{\lambda} \sqrt{x^2 + y^2} \text{NA}_2 + \phi_s \quad (\text{S3})$$

40 where  $\lambda$  is the working wavelength centered at 1.55  $\mu\text{m}$ ,  $(x, y)$  indicates the position of each  
 41 nanoantenna, NA refers to the numerical aperture of the BB,  $\phi_s = \arctan(y/x)$  is the azimuthal  
 42 coordinate, associated with the phase profile of an  $\ell = 1$  vortex. The phase profiles are illustrated  
 43 in Fig. S1(a). The first row shows the phase of  $J_0$  (C) polarized along the  $x$ -axis, while the second  
 44 row shows the phase of  $J_1$  (E), polarized along  $y$ -axis. The combination of the fiber's correction  
 45 phase  $\phi_A = -P_s(x, y)$  and the axion phase  $\phi_B$  generates the  $J_0$  phase profile  $\phi_C$ . The addition of  
 46 the helical phase  $\phi_D$  into the  $J_0$  phase  $\phi_C$  yields the first-order Bessel phase profile  $\phi_E$ . To realize  
 47 skyrmions with subwavelength polarization features, both  $\text{NA}_1$  and  $\text{NA}_2$  are chosen as 0.8.

48 The metasurface is composed by arrays of meta-units illustrated in Fig. S1(b), consisting of  
 49 amorphous silicon (a-Si) antennas laying on top of a  $\text{SiO}_2$  substrate. Due to the high refractive index  
 50 contrast between the a-Si ( $n = 3.48$ ) and air ( $n = 1$ ), these nanoantennas act as a birefringent  
 51 waveguides<sup>3</sup>, with very high transmissivity and negligible cross-talk. Following the propagation  
 52 phase method, the geometries of the nanopillars map different wavefronts in the  $x$  and  $y$  polarizations  
 53 as in Eq. (S2-S3). To achieve optimal performance, the parameters  $D_x$  and  $D_y$  of the  $m$ th antenna  
 54 are determined using the following optimization formula<sup>2</sup>:

$$55 \quad \min_{(D_x, D_y), \phi_0 \in [0, 2\pi]} \left\{ \sum_m \max\{|\phi_x^{\text{design}} - \phi_x^{\text{simulation}}|, |\phi_y^{\text{design}} - \phi_y^{\text{simulation}}|\} \right\} \quad (\text{S4})$$

56 where  $\phi_x$  and  $\phi_y$  represent the phase changes of the incident electric field polarized along  $x$ - and  
 57  $y$ - axes respectively. The nanoantenna responses are numerically calculated sweeping all the  
 58 combinations of  $D_x$  and  $D_y$ . Considering the implications of the system's two-fold ( $C_2$ ) rotational  
 59 symmetry<sup>4</sup>, the phase shifts  $\phi_y/2\pi$  and transmissivity  $T_y$  in the  $y$  polarization can be easily  
 60 obtained by swapping the  $x$  and  $y$  axes of the  $x$  polarization response. In this way, different  
 61 functionalities are achieved in orthogonal polarizations, so that the dual-order BBs generators can  
 62 be applied in fiber-facet integrated with a single-layer metasurface.

63 Due to the Nyquist sampling theorem, at least two discretization elements must be placed  
 64 within the  $2\pi$  phase coverage to produce BBs with a large NA and subwavelength resolution. In  
 65 order to meet the phase requirement and for ease of fabrication, the square lattice period is fixed at  
 66  $P = 700$  nm, much smaller than the wavelength to minimize diffracting effects. The antennas' height  
 67  $H$  is fixed as 900 nm while the length  $D_x$  and  $D_y$  of the principal axes  $x$  and  $y$  change from 250 to  
 68 550 nm to modulate  $\phi_x$  and  $\phi_y$ . Fig. S1(c) and (d) show the phase shift  $\phi_x/2\pi$  and  
 69 transmissivity  $T_x$  of the unit cell when shined with  $x$ -polarized light at the working wavelength  $\lambda$   
 70  $= 1.55$   $\mu\text{m}$ . The phase shift for  $y$  polarization can be obtained by transposing the phase shift in  $x$   
 71 polarization. The results are obtained with vector simulations with the commercial software  
 72 Lumerical FDTD solutions. In the unit cell, periodic boundary conditions are applied in the  $x$  and  $y$   
 73 directions and perfectly matched layers are applied in the  $z$  direction.

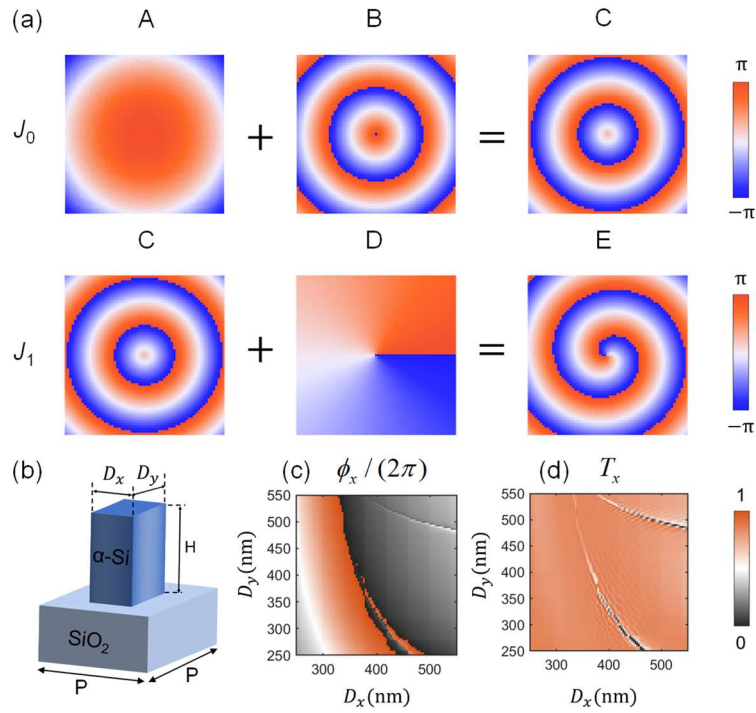

74

75 Fig. S1 (a) The phase distributions superimposed on the dielectric metasurface are denoted by A, B, C, D, E, which  
 76 correspond to the correction phase of the source, the axion phase, the phase of  $J_0$ , the phase of helical vortex, the  
 77 phase of  $J_1$ . (b) The unit cell of the metasurface. (c) Phase shift and (d) Transmissivity for x polarization.

78 **Supplementary Note 2: Diffusion analysis of light within expansion section and chosen light**  
 79 **distribution**

80 The PSF (Polarization Maintaining Fiber, PM1550-HP) has a core diameter of  $8.5 \mu\text{m}$  and a cladding  
 81 diameter of  $125 \mu\text{m}$ . Light coming out of the PSF enters the expansion section and diffuses. The  
 82 light beam expands as it propagates, as shown in Fig. S2. Typically, the size of the metasurface is  
 83 larger than the size of the light field in order to ensure high light utilization efficiency. However,  
 84 large metasurface sizes lead to higher fabrication costs. If the radius of the metasurface becomes  $m$   
 85 times larger, the area becomes  $m^2$  times larger, resulting in  $m^2$  times the processing cost.  
 86 Knowing that the full width at half maximum contains most of the energy of the light field, designing  
 87 the metasurface diameter slightly larger than the full-width half-maximum of the input field  
 88 maximizes the trade-off between high efficiency and low cost. Therefore, considering a metasurface  
 89 diameter of  $56 \mu\text{m}$ , we choose a propagation distance of  $350 \mu\text{m}$ , so that the FWHM of the input  
 90 light field is  $43 \mu\text{m}$ . The intensity and phase distributions are plotted in Fig. S2(c) for both an XY  
 91 cross section and an  $x$ -axis slice. In addition, the expansion section is composed of two parts: the  
 92  $\text{SiO}_2$  substrate of the metasurface and the ultraviolet curing glue which links the fiber holder and  
 93 the metasurface substrate, and they have thickness of  $300 \mu\text{m}$  and  $50 \mu\text{m}$ , respectively. This  
 94 refractive index of the glue matches that of the quartz substrate and the fiber cladding 1.44.

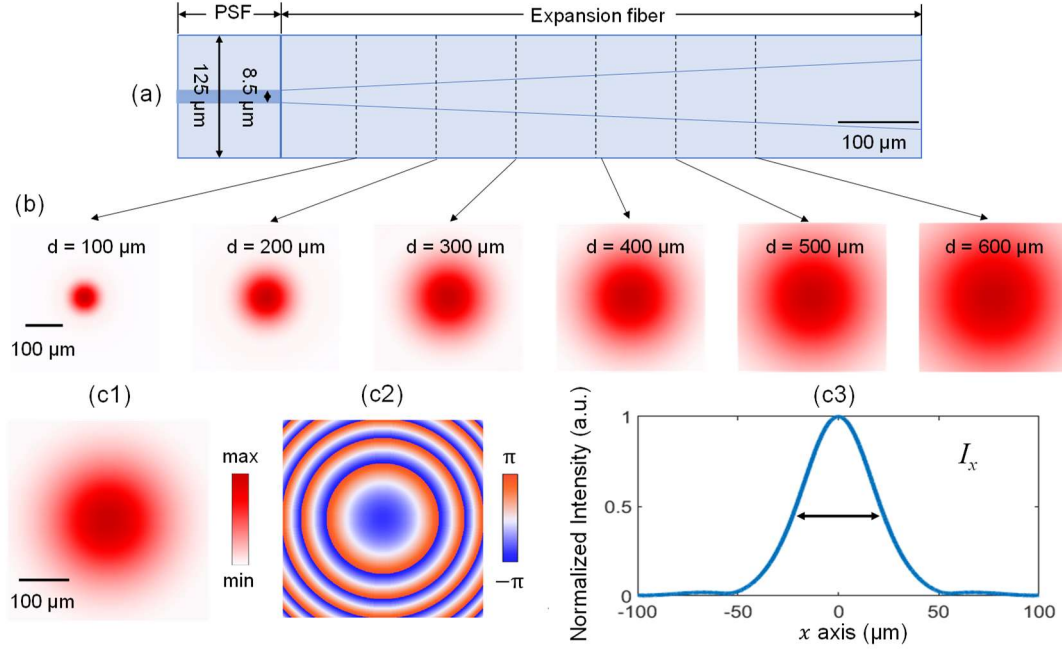

95  
 96 Fig. S2 Analysis of light propagation within expansion section. The index of expansion section is same to SiO<sub>2</sub>. (a)  
 97 Cross-sectional view of optical fiber along the propagation direction. (b) The transverse light field distributions in  
 98 different propagating distances. (c1-c2) The complex amplitude distribution and (c3) intensity curve of selected light  
 99 source.

### 100 **Supplementary Note 3: The skyrmion density and skyrmion number in regulation**

101 The Stokes parameters of skyrmion are reconstructed from the relations as:

$$102 \begin{pmatrix} S_0 \\ S_x \\ S_y \\ S_z \end{pmatrix} = \frac{1}{E_R^2 + E_L^2} \begin{pmatrix} E_R^2 + E_L^2 \\ 2 \cdot E_R \cdot E_L \cdot \cos(\varphi_R - \varphi_L) \\ 2 \cdot E_R \cdot E_L \cdot \sin(\varphi_R - \varphi_L) \\ E_R^2 - E_L^2 \end{pmatrix} \quad (S5)$$

103 where  $E_R$  and  $E_L$  represent the recovery complex amplitude of the RCP and LCP components. The  
 104 skyrmion density is calculated by Eq. (3) and its integration over the transverse plane yields the  
 105 skyrmion number as in Eq. (2). To characterize the mode evolution from non-skyrmion to skyrmion,  
 106 the skyrmion densities of different polarization angles are illustrated in Fig. S4. When the  
 107 polarization angle is equals to 0°, the light profile corresponds to the scalar zeroth-order BB,  
 108 showing a zero skyrmion number; in the same way as when angle equals to 90°, the profile is a pure  
 109 scalar first-order BB, showing again a near-zero skyrmion number. When the angle varies between  
 110 40°-70°, the intensities of zeroth-order and first-order BBs are comparable one to each other,  
 111 showing a stable and skyrmion with near unity skyrmion number. The PS coverage along  $\theta$  is also  
 112 illustrated in Fig. S4. As we can see, between 40° to 70°, the skyrmion numbers are extremely close  
 113 to 1, proving that our skyrmion generator is capable of exciting a nearly perfect skyrmion at angles  
 114 larger than 30°. This means that in practice, the polarization of the light source does not need to be  
 115 adjusted very precisely to achieve the desired skyrmion, which is very useful in practical  
 116 applications.

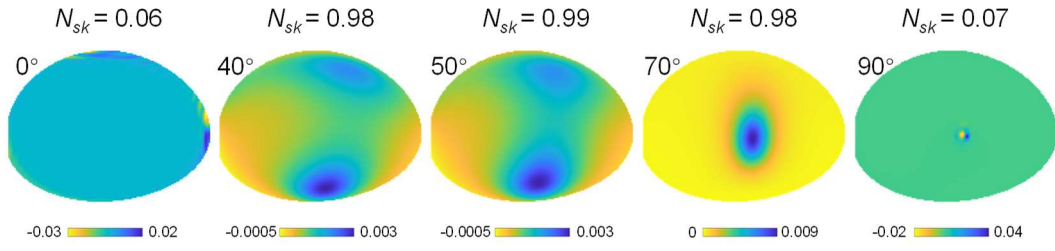

117

118 Fig. S3 The skyrmion densities for different input polarization angles.

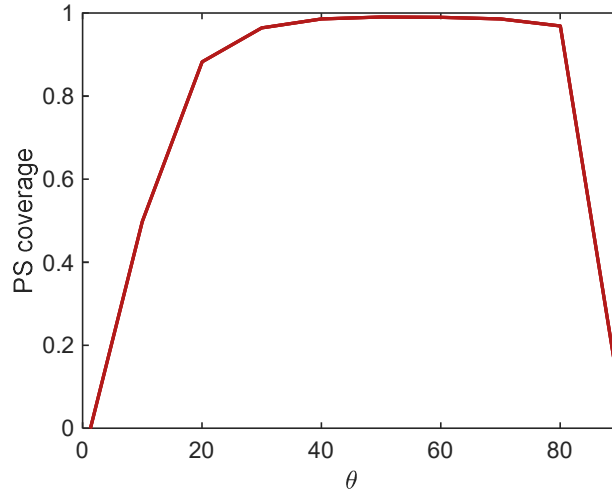

119

120 Fig. S4 The Poincaré sphere (PS) coverage as a function of the polarization angle  $\theta$ .

121

#### Supplementary Note 4: The Poincaré Sphere in regulation

122

123 A more detailed description of the skyrmion type using the Poincaré Sphere with different  
 124 polarization angles  $\theta$  at intervals of  $10^\circ$  is illustrated in Fig. S5. A Stokes skyrmion can be realized  
 125 when the HL-colored map covers the entire sphere. As seen in the figure, the HL are almost fully  
 126 mapped when  $\theta$  ranges from  $40^\circ - 70^\circ$ , showing high quality skyrmions. Meanwhile, the  
 127 interconversion between skyrmion and bimeron can be realized by a quarter-wave plate, whose  
 128 effect is equivalent to a transformation of the polarization basis, which corresponds to the  
 129 transformation of the coordinate axis of the Poincaré sphere. To take a special case, when the angle  
 130 between the fast-axis of quarter-wave plate and the  $x$ -axis is  $45^\circ$ , the coordinate system of the  
 131 Poincaré sphere  $(S_x, S_y, S_z)$  changes to  $(S_z, S_x, S_y)$ . This coordinate transformation does not affect  
 132 the topology as well as the skyrmion number, but causes a transformation of the Stokes field, as  
 specified in Methods. The bimeron type is also represented in the Poincaré Sphere in Fig. S6.

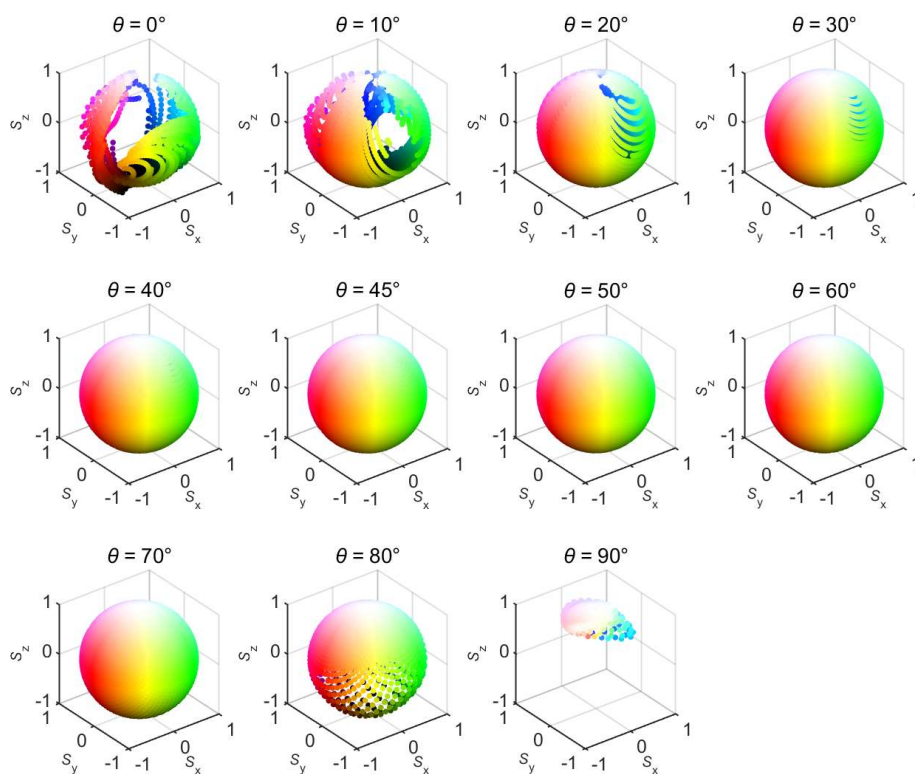

133

134 Fig. S5 The Poincaré Sphere in simulations when the polarization angle  $\theta$  changes: transitions between skyrmion  
 135 and non-skyrmion states.

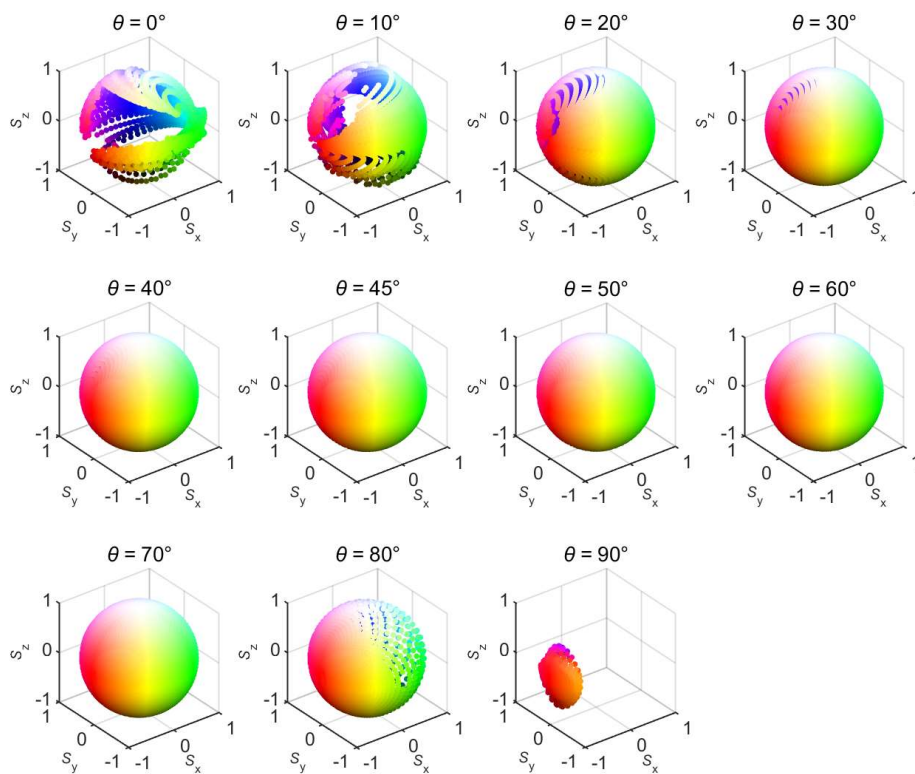

136

137 Fig. S6 Simulation of the Poincaré Sphere when changing the polarization angle  $\theta$ : transformation between bimeron  
 138 and non-bimeron states.

139 **Supplementary Note 5: The broadband and non-diffraction properties of proposed device**

140 The broadband properties of our proposed device are also demonstrated. The profiles of  $J_0$  and  $J_1$   
 141 and their corresponding vector fields for different wavelengths in the range of 1.45  $\mu\text{m}$  to 1.65  $\mu\text{m}$   
 142 are shown in Fig. S7(a-b). It is worth noting that the difference in refractive indices of the a-Si and  
 143  $\text{SiO}_2$  as well as the difference in the size of the light source after the expansion section for different  
 144 wavelengths are also taken into account in the simulations. As we can see, the profiles of  $J_0$  and  $J_1$   
 145 experience subtle changes, while the Stokes vector fields show a highly robustness over the 200 nm  
 146 bandwidth.

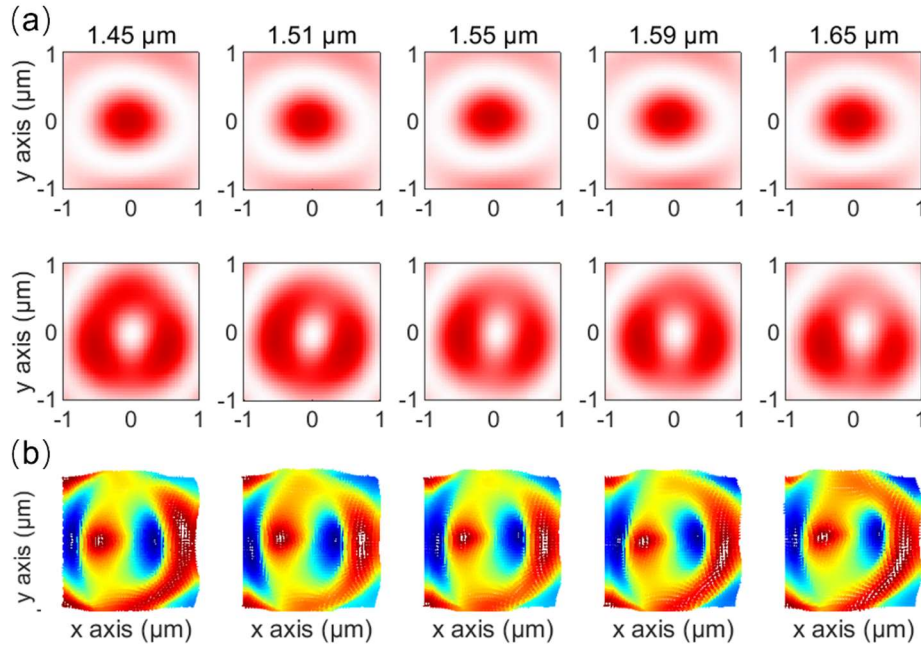

147  
 148 Fig. S7 (a) Measured intensity distributions of the  $x$ -polarization (upper row) and  $y$ -polarization (lower row) from  
 149 1.45  $\mu\text{m}$  to 1.65  $\mu\text{m}$  respectively. (b) The corresponding vector distributions over the 200 nm bandwidth.

150 Besides, we have also simulated the construction of Stokes skyrmion over different distances  
 151 in the depth of focus of quasi-Bessel beams. The intensity distributions under orthogonal  
 152 polarizations and the vector distributions are shown in Fig. S8. And the Stokes Poincaré spheres  
 153 over different propagation distances and corresponding skyrmion numbers are also illustrated in Fig.  
 154 S9. It can be observed that as the propagation distance increases, the transverse electric field  
 155 distributions and vector distributions of the realized Stokes skyrmion, as well as the Stokes numbers,  
 156 remain nearly unchanged, demonstrating a nearly non-diffraction property. It indicates that the  
 157 presence of longitudinal electric component  $E_z$  seldom impacts the transverse polarization  
 158 distribution, barely disrupting the topological features of the Stokes skyrmions reported in this  
 159 manuscript.

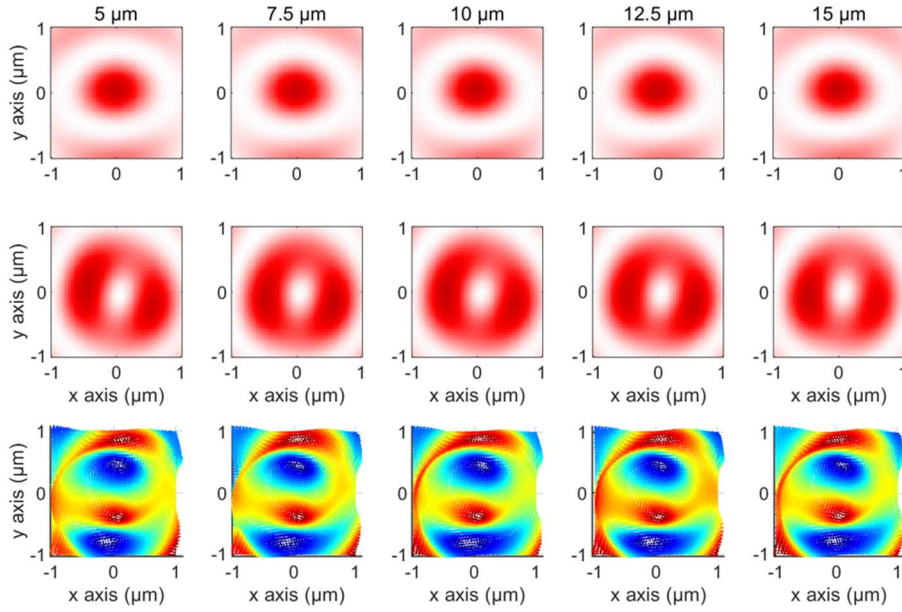

160  
 161 Fig. S8 (a) Measured intensity distributions of the  $x$ -polarization (upper row) and  $y$ -polarization (middle row), and  
 162 vector distributions (lower row) after different beam propagation distances from  $5\ \mu\text{m}$  to  $15\ \mu\text{m}$  with a step of  $2.5\ \mu\text{m}$   
 163  $\mu\text{m}$  accordingly.

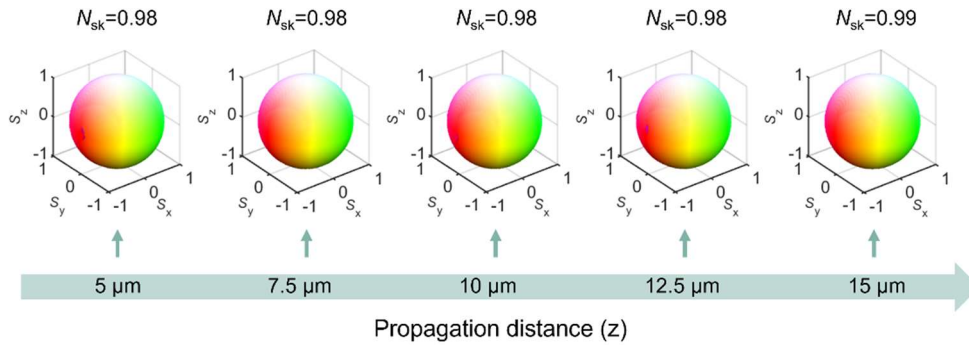

164  
 165 Fig. S9 The corresponding Stokes Poincaré spheres with skyrmion numbers shown over different propagation  
 166 distances off the fiber facet.

167



168

### Supplementary Note 6: Fabrication procedure

169

To ensure the high-precision tuning of the propagation phase, we select EBL technology for the

170

metasurface fabrication. The flowchart for fabrication procedure is shown in Fig. S10. In the figure,

171

gray represents quartz substrate, gold represents a-Si, light yellow represents photoresist, and black

172

represents Cr.

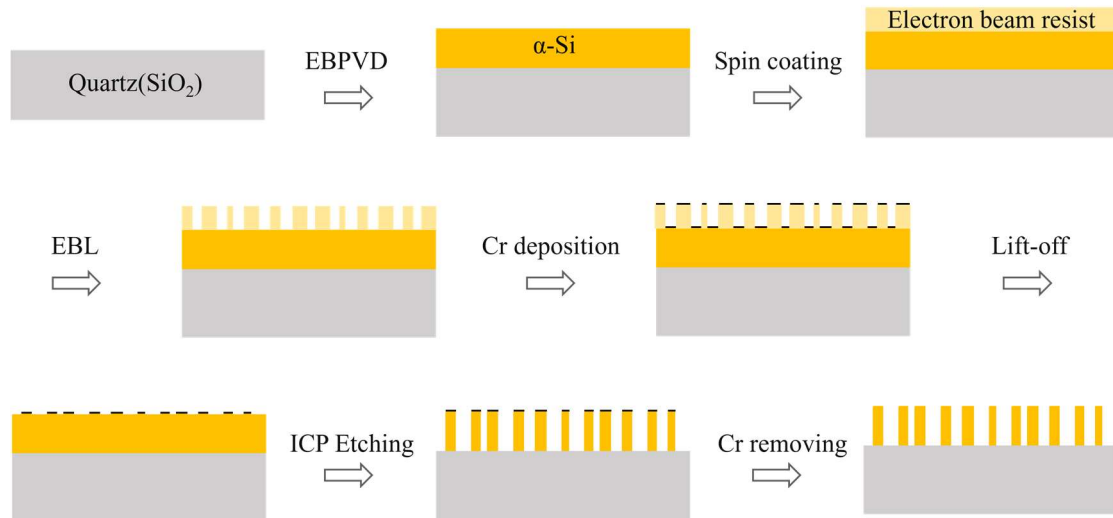

173

174

Fig. S10 Illustration of the metasurface fabrication procedure. EBPVD: Electron Beam Physical Vapor Deposition.

175

EBL: Electron Beam Lithography. ICP Etching: Inductively Coupled Plasma Etching.

176

### Supplementary Note 7: Analysis of errors in fabrication procedures and experimental processes

177

178

The two most significant errors in the proposed metafiber may occur from the fabrication procedures

179

and the experimental processes. Dimensional errors during fabrication can result in variations in the

180

size and shape of the structure that can affect its performance. Misalignment between the fiber center

181

and the metasurface center can lead to distortion of the optical signal, and an angle deviation

182

between the optical axis of the fiber and the normal direction of the metasurface could cause signal

183

distortion. Therefore, a thorough analysis of these errors is essential to ensure the robustness and

184

reliability of the structure.

185

Considering the resolution of the fabrication methods like EBL and ICP, fabrication error may

186

induce imprecisions in the height and size of the antennas. Firstly, we perform an error analysis with

187

respect to the height of the antenna. The designed height is  $0.9 \mu\text{m}$ , so we analyze two heights,  $0.85$

188

$\mu\text{m}$  and  $0.95 \mu\text{m}$  to study the performance robustness of the device. The profiles  $J_0$  and  $J_1$ , as shown

189

in Fig. S11, indicate a very slight diffusion the and a small increase sizes, but the overall distributions

190

remain consistent, demonstrating good robustness. Secondly, size errors typically include consistent

191

errors and random Gaussian errors. The upper two rows of Fig. S12 depict the output fields for a

192

metasurface subjected to consistent size error of  $5 \text{ nm}$ ,  $10 \text{ nm}$ , and  $15 \text{ nm}$ . The lower two rows of

193

Fig. S12 display the profiles when antennas are subjected to gaussian errors with the variance of  $5$

194

$\text{nm}$ ,  $10 \text{ nm}$ ,  $15 \text{ nm}$ . The black dashed line shows the ideal results, and we can see that when the

195

errors are introduced, the intensity distributions of  $J_0$  and  $J_1$  remain almost unchanged,

196

demonstrating excellent robustness.

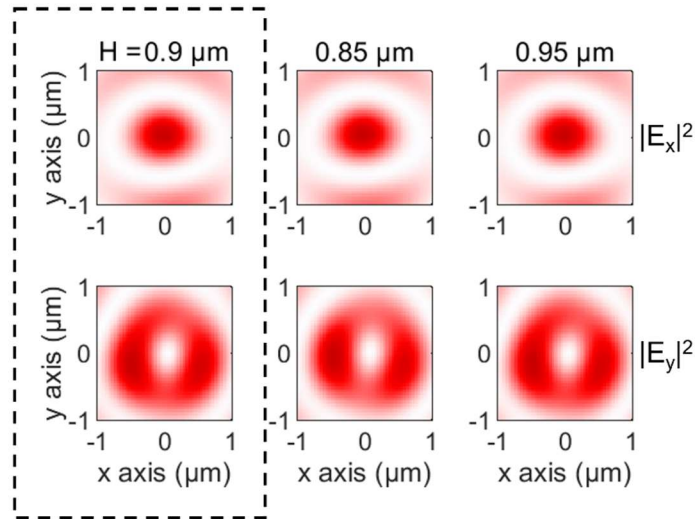

197

198 Fig. S11 The analysis of antennas height error. The three columns depict the intensity profile over height of 0.9  $\mu\text{m}$ ,

199 0.85  $\mu\text{m}$ , 0.95  $\mu\text{m}$ , from left to right respectively. The upper and lower rows represent profile in  $x$  and  $y$  polarizations

200 respectively. The black box indicates our design's profiles.

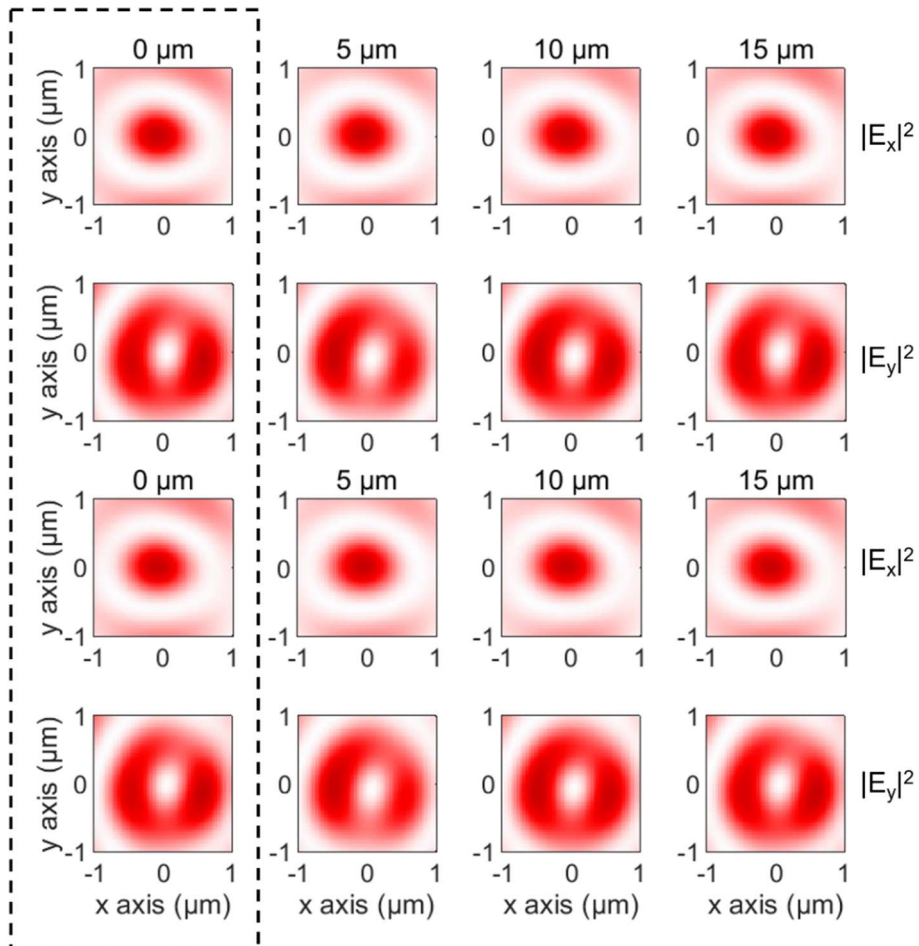

201

202 Fig. S12 The analysis of antennas size error. The upper two rows depict the intensity profile over consistent errors

203 of 5 nm, 10 nm, 15 nm in the  $x$  and  $y$  polarizations respectively. The third row and the fourth row depict the intensity

204 profile over gaussian errors with the variance of 5 nm, 10 nm, 15 nm in the  $x$  and  $y$  polarizations respectively. The

205 black box indicates our design's profiles.

206 In the experimental process, it is crucial to align the fiber with the metasurface, which can  
 207 significantly impact the device's output. The most common errors in this aspect are the misalignment  
 208 of the fiber optic axis with the vertical axis of the metasurface and the differences in the lateral  
 209 positions of the two centers, respectively. The illustrations of the angle error are shown in Fig. S13.  
 210 Ideally, the central optical fiber axis overlaps with the central axis of the metasurface, shown in Fig.  
 211 S13(a). An indication of angular errors on the  $x$ -axis and on the  $y$ -axis as shown in Fig. S13(b) and  
 212 (c), respectively. The left and right columns represent the output profiles when  $angle_y = -1^\circ$   
 213 and  $angle_y = 1^\circ$ , respectively. Then, we add  $angle_x = \pm 1^\circ$  to the design, so that the profiles  
 214 shift on the  $x$ -axes. If non-zero  $angle_y$  appears, the profile will be shifted on the  $y$ -axis.  
 215 Nevertheless, the intensity profile still mimics clear zeroth-order and first-order BBs. The scenarios  
 216 of lateral positional errors are shown in Fig. S14, showing the mismatch between the fiber center  
 217 and the metasurface center when we add a  $\pm 5 \mu\text{m}$  lateral positional error. The output optical fields  
 218 experience a lateral shift, but the overall profile remains stable, indicating that the proposed structure  
 219 possesses strong robustness.

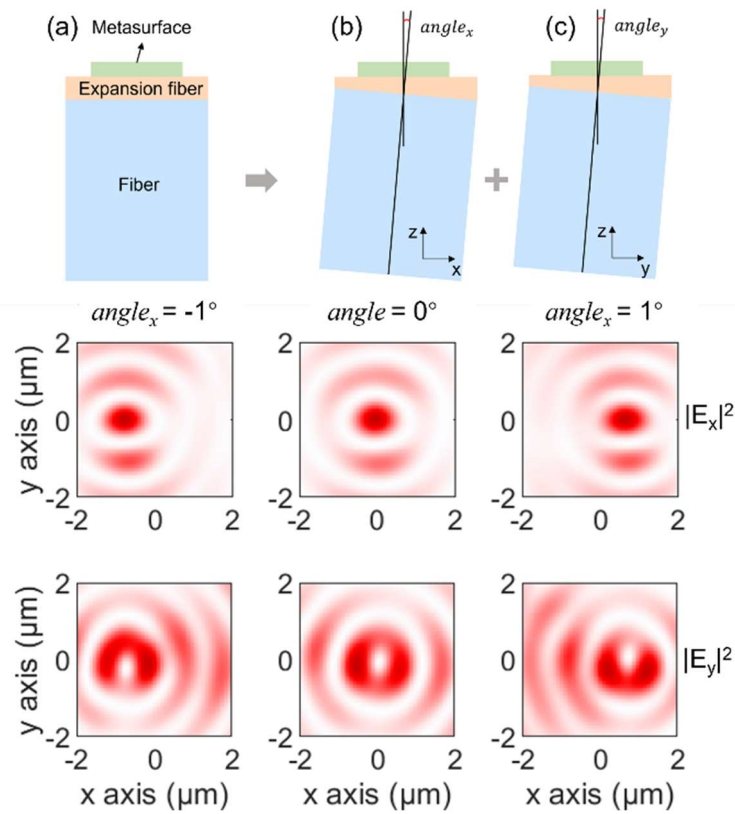

220

221 Fig. S13 The error analysis of the angle error. (a)-(c) The illustrations of the angle error.

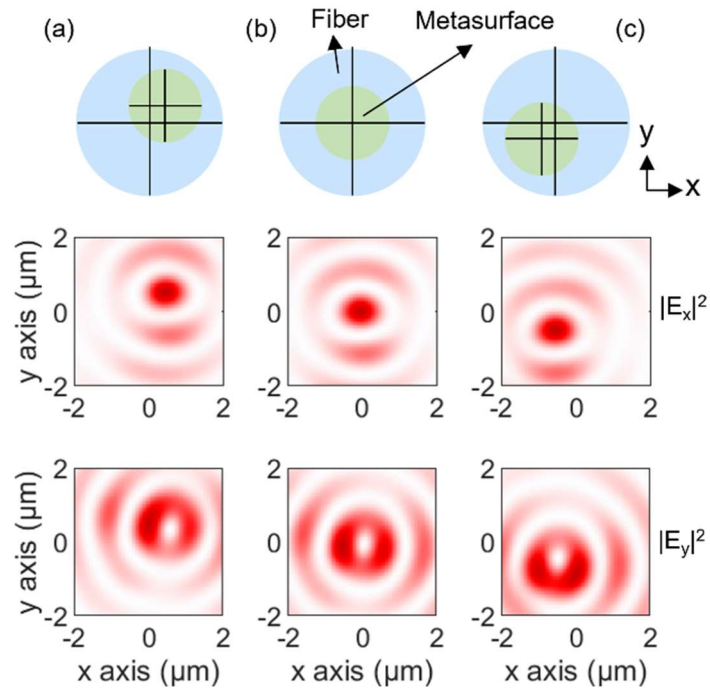

222

223 Fig. S14 The error analysis of the lateral positions. Ideally, the two centers are overlapped, shown in (b). Schematics  
 224 with the center of the metasurface at the lower right and upper left corners of the fiber center are shown in (a) and  
 225 (c), with its light field below the schematic. The position error steps are chosen as  $5\ \mu\text{m}$  in  $x$  and  $y$  axis. From the  
 226 profiles, the light field distributions will be shifted when the position error exists. The distribution of the light field  
 227 moves in the same direction as the center of the metasurface. Nevertheless, the light field's intensity distribution is  
 228 almost unchanged, showing outstanding robustness.

229

### Supplementary Note 8: Experimental setup

230 The experimental setup consists of two optical paths: the amplified light path (upper path) and the  
 231 coherent light path (lower path). The object wave propagates through the amplified light path, while  
 232 the collimated plane wave propagates through the coherent light path. The two beams interfere when  
 233 passing through a polarization beam splitter (PBS), resulting in an interference light field. When  
 234 both optical paths are simultaneously combined, the intensity distribution resulting from the  
 235 interference between the object wave and the plane wave can be obtained. By removing the  
 236 amplified light path, the intensity distribution of the collimated plane wave can be obtained. The  
 237 polarizers are used in the two paths to select a certain polarization. By changing the directions of  
 238 the polarizers in  $x$ - or  $y$ - axis at the same time, the intensities of interference light fields and  
 239 collimated plane wave under  $x$  and  $y$  polarizations could be collected for complex amplitude  
 240 recovery in Supplementary Note 9.

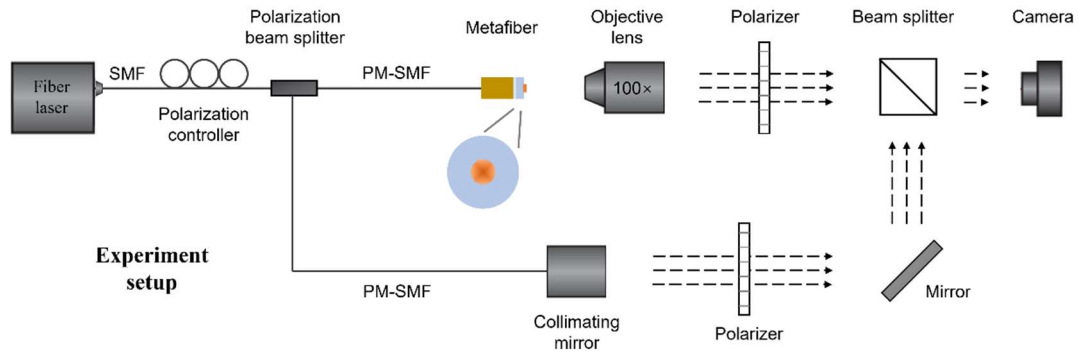

241

242 Fig. S15 Experiment setup, containing two optical paths: the amplified light path (upper) and the coherent light path

243 (lower).

244

### Supplementary Note 9: Experimental complex amplitude recovery

245 From experiment setup in Supplementary Note 8, we could obtain the intensity profiles of  
 246 interference waves under  $x$  and  $y$  polarizations. The complex amplitude of interference wave can be  
 247 obtained from intensity profiles of interference waves using the procedure shown in Fig. S16. The  
 248 intensity profiles of plane wave are also obtained in the experience and the phase profiles are planer.  
 249 The complex amplitude profiles of object wave can be derived by dividing the complex amplitude  
 250 of interference wave by the conjugated reference plane wave (shown as Fig. S17 and Fig. S18).

251 The procedure of recovering the complex amplitude of the interference fields are illustrated in  
 252 Fig. S16. Firstly, the intensities of interference fields (1<sup>st</sup> column) in  $x$  (upper row) and  $y$  (lower row)  
 253 directions are collected experimentally. Then, the interferometric intensities are Fourier transformed.  
 254 The Fourier transformed images (2<sup>nd</sup> column) consist of three main parts: the zeroth-order  
 255 containing the background information, the first order +1, and the conjugate order -1. Due to the  
 256 completely off-axis interference mode, the zero-th order, +1- and -1- orders are completely separated  
 257 in the spectrum of the interferogram. Subsequently, the phase informations are extracted by spatial  
 258 filtering the first order (3<sup>rd</sup> column) and performed inverse Fourier transform, obtaining the complex  
 259 amplitudes of the interference profiles(object wave + plane wave), shown as the 4<sup>th</sup> column.

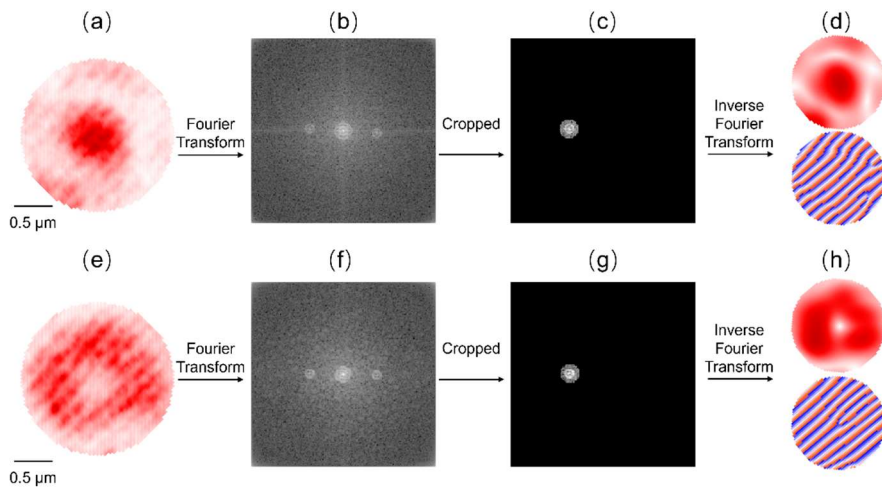

260

261 Fig. S16 The process of recovering the complex amplitudes of interference fields under (a)-(d)  $x$  polarization and

262 (e)-(h)  $y$  polarization.

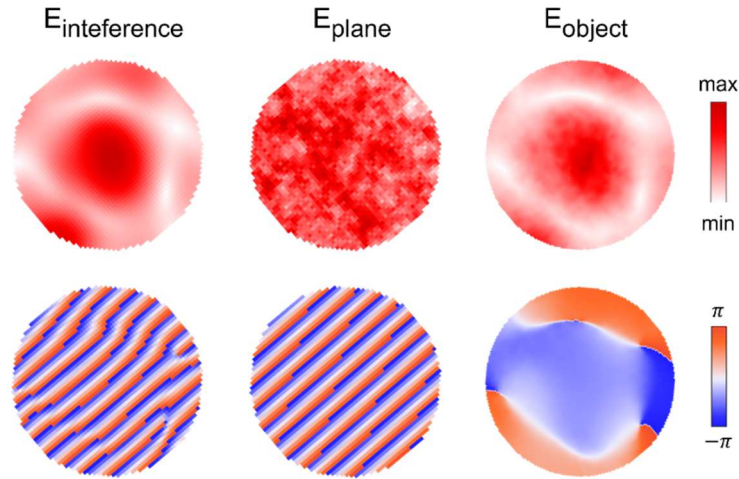

263

264 Fig. S17 The process of Complex amplitude recovery in  $x$  polarization in experiments. The complex amplitudes of  
 265 the object wave (third column) are derived by dividing the interference complex amplitude field (first column) by  
 266 the conjugate complex amplitude profile of the coherent plane beam (second column).

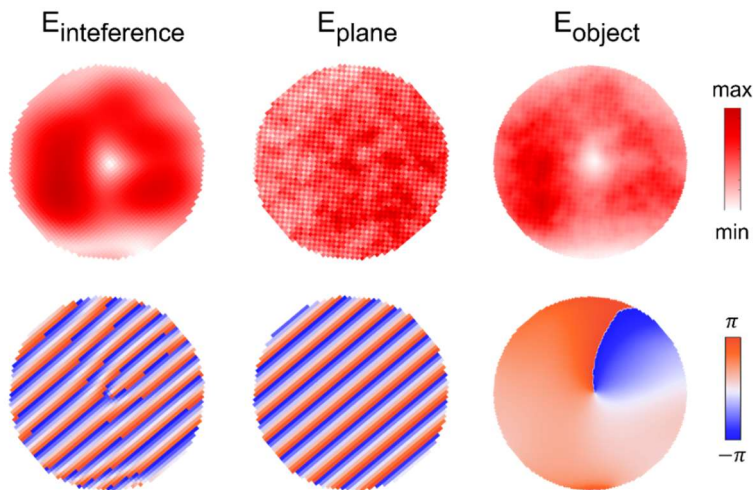

267

268 Fig. S18 The process of Complex amplitude recovery in  $y$  polarization in experience. The complex amplitudes of  
 269 object wave (third column) are derived by dividing the interference complex amplitude field (first column) by the  
 270 conjugate complex amplitude profile of the coherent plane beam (second column).

271

### Supplementary Note 10: The Stokes parameters of skyrmion

272

Based on the above method, the actual  $E_x$  and  $E_y$  are obtained, and the corresponding  $E_L$  and  $E_R$  can  
 273 be obtained by introducing a quarter-wave plate with the fast axis at  $45^\circ$  to the  $x$ -axis, resulting in a  
 274 Stokes skyrmionic beam. The corresponding experimental Stokes parameters of skyrmion texture  
 275 calculated by Eq. (S5) are illustrated in Fig. S19.

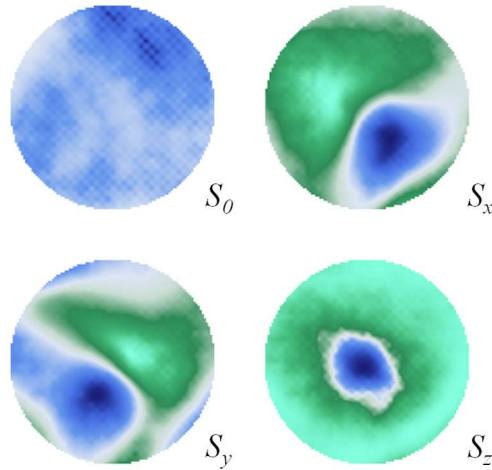

276

277 Fig. S19 The polarization distributions of realized skyrmion texture.

278 **Supplementary Note 11: The polarization distribution of bimeron in experiments**

279 Bimeron and skyrmion are two quasiparticles which can be interchanged through a topological  
 280 transformation using a QWP. By shaping a zeroth-order BB as  $|H\rangle$  and first-order as  $|V\rangle$ , the  
 281 bimeron state is realized. The polarization distribution of bimeron is also illustrated in Fig. S20. The  
 282 skyrmion number of bimeron texture calculated from experiments is 0.97, equalling to the skyrmion  
 283 number of skyrmion texture. For experimentally generated optical skyrmions, the non-integer  
 284 skyrmion number can be utilized to quantize the quality of the measured skyrmions with respect to  
 285 the perfect ones.

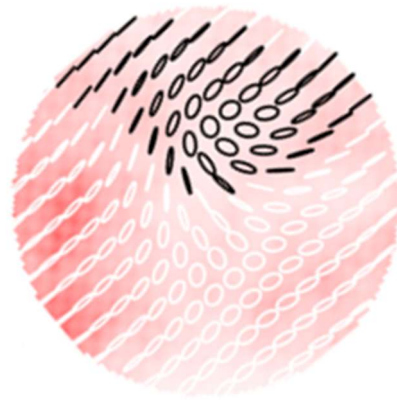

286

287 Fig. S20 The polarization distributions of realized bimeron texture.

288 **Supplementary Note 12: The Poincaré Sphere of skyrmion and bimeron in experiments**

289 By means of the Stokes parameters mentioned above, the Poincaré sphere in experiments is  
 290 illustrated in Fig. S21. The skyrmion and bimeron states can be obtained when the input light source  
 291 is polarized at  $45^\circ$ , and their Poincaré spheres are shown in Fig. S21b and Fig. S21c. From the figures,  
 292 the entire HL-colored maps are covered except very few points, showing high quality skyrmions,  
 293 and they are well consistent with the obtained skyrmion number of 0.97. When the source  
 294 polarization angle is  $0^\circ$  (Fig. S21(a)), the resulting beam is scalar and only contains a single point  
 295 in the Poincaré sphere  $(S_x, S_y, S_z) = (0, 0, 1)$ , which corresponds to the RCP polarization. Similarly,

296 when the input polarization angle is  $90^\circ$  (Fig. S21(d)), the output polarization is  $(S_x, S_y, S_z) = (0, 0,$   
 297  $-1)$ , which corresponds to the LCP.

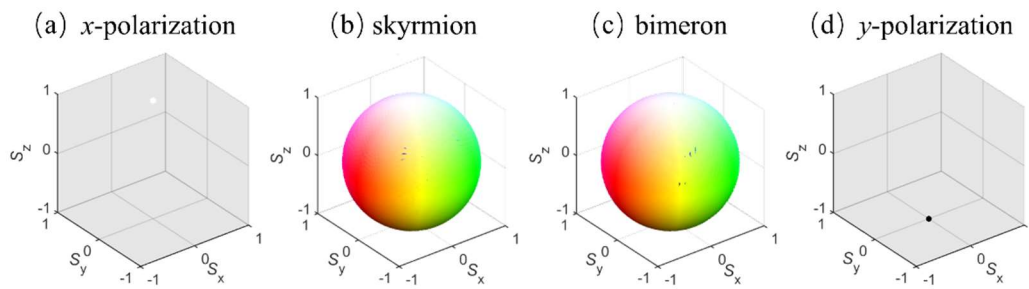

298

299 Fig. S21 The Poincaré Sphere of skyrmion, bimeron and non-skyrmion states in experience.

300

### Supplementary Note 13: Error discussions

301 The simulation results of the electric field are in good agreement with the experimental results, but  
 302 still have minor variations, mainly from several aspects. Firstly, the size of the generated beams is  
 303 extremely small with respect to the pixel size of the camera ( $5.2 \mu\text{m}$ ), leading to a sparse sampling  
 304 although the captured beams are magnified by  $100\times$ . The insufficient resolution may result in the  
 305 loss of points, causing a slight difference in the intensity profiles. Secondly, the process of complex  
 306 amplitude recovery is sensitive to misalignment between the two arms of the interferometers, which  
 307 include the propagation directions as well as polarizers' directions in the two optical paths cannot  
 308 be perfectly parallel, yielding small errors in the reconstructed complex field. Thirdly, the accuracy  
 309 of the processing methods could cause discrepancies with respect to the ideal case. After  
 310 computationally extensive simulations and experiments, considering the constrained processing  
 311 conditions, the phase shift of  $2\pi$ , and the optimal illumination scheme, an antenna period of  $700 \text{ nm}$   
 312 with dimensions ranging from  $250$  to  $550 \text{ nm}$  was determined. However, deviations are inevitable  
 313 during metasurface fabrication and experiments. Still, the experimental results verified the great  
 314 robustness of the device under the different kinds of imperfections. A detailed error analysis the  
 315 metasurface is presented in the Supplementary Note 6, demonstrating an excellent robustness of our  
 316 proposed device.

317

### Supplementary References

- 318 1 Chen, W. T., Khorasaninejad, M., Zhu, A. Y., Oh, J., Devlin, R. C., Zaidi, A. *et al.* Generation  
 319 of wavelength-independent subwavelength Bessel beams using metasurfaces. *Light: Science &*  
 320 *Applications* **6**, e16259-e16259 (2017).  
 321 2 Meng, Y., Liu, Z., Xie, Z., Wang, R., Qi, T., Hu, F. *et al.* Versatile on-chip light coupling and  
 322 (de)multiplexing from arbitrary polarizations to controlled waveguide modes using an  
 323 integrated dielectric metasurface. *Photonics Research* **8**, 564-576 (2020).  
 324 3 Nanfang, Y., Genevet, P., Aieta, F., Kats, M. A., Blanchard, R., Aoust, G. *et al.* Flat Optics:  
 325 Controlling Wavefronts With Optical Antenna Metasurfaces. *IEEE Journal of Selected Topics*  
 326 *in Quantum Electronics* **19**, 4700423-4700423 (2013).  
 327 4 Balthasar Mueller, J. P., Rubin, N. A., Devlin, R. C., Groever, B. & Capasso, F. Metasurface  
 328 Polarization Optics: Independent Phase Control of Arbitrary Orthogonal States of Polarization.  
 329 *Physical Review Letters* **118**, 113901 (2017).
